# Supplementary material
Source: PubMed Central journal article supplement (PMC3719517)
Supplement: AEM.00780-13_zam999104558so1.pdf [file AEM.00780-13_zam999104558so1.pdf]

## 1 Supplemental Methods

2

3 **Construction of deletion mutants and complemented strains.** Gene deletion mutants

4 of *S. mutans* UA159 were constructed according to a method described elsewhere (1).

5 Briefly, erythromycin (Em<sup>r</sup>) or spectinomycin (Spc<sup>r</sup>) resistance gene without the

6 terminator was amplified by PCR from pResEmNot (2) or pSPC2310 (3) with specific

7 primers and cloned into pBluescript SK II (+) (yielding pBSSKEm<sup>r</sup> and pBSSKSp<sup>r</sup>,

8 respectively). The 5' and 3'-flanking regions of the target *S. mutans* gene were then

9 PCR-amplified from *S. mutans* genomic DNA with specific primers, and each fragment

10 was cloned into both ends of the Em<sup>r</sup>/Sp<sup>r</sup> gene to generate a gene cassette comprising

11 the Em<sup>r</sup>/Sp<sup>r</sup> gene with the flanking region of the target gene. After PCR amplification

12 of the whole gene, the PCR fragment was transformed into *S. mutans*. Mutants were

13 isolated by selection for erythromycin/spectinomycin resistance. The primers used are

14 listed in Table S1.

15 For genetic complementation, we constructed a DNA fragment in which the gene

16 containing the Em<sup>r</sup>/Sp<sup>r</sup> gene and the target gene was inserted into the *ftf* gene, which

17 encodes fructosyltransferase. First, the target gene and the 3'-terminal region of the *ftf*

18 gene (*ftf-2*) were amplified with specific primers, which resulted in the addition of an  
19 extra eight or nine nucleotides for annealing. The target gene and *ftf-2* were then fused.  
20 The 5'-terminal region of the *ftf* gene (*ftf-1*) was cloned into pBSSKEm<sup>r</sup>/pBSSKSp<sup>c</sup>,  
21 yielding pBSSKEm<sup>r</sup>::*ftf-1* and pBSSKSp<sup>c</sup>::*ftf-1*, respectively. Then, the fusion  
22 fragment of the target gene and *ftf-2* were cloned into pBSSKEm<sup>r</sup>::*ftf-1*/  
23 pBSSKSp<sup>c</sup>::*ftf-1* downstream of the Em<sup>r</sup>/Sp<sup>c</sup> gene. Finally, the fragment for  
24 complementation was amplified with specific primers and transformed into each  
25 mutant, permitting insertion of the fragment into *S. mutans* chromosomal DNA by  
26 homologous recombination. The complemented strains were isolated by selection for  
27 erythromycin and spectinomycin resistance. Finally, the insertion of the Em<sup>r</sup>/Sp<sup>c</sup> and  
28 target genes into the *ftf* gene was verified by PCR.

29

30 **Microarray analysis.** Overnight cultures of *S. mutans* (10<sup>8</sup> cells) were inoculated into  
31 10 ml of fresh TSB, which was, then cultured at 37°C with 5% CO<sub>2</sub>. When the optical  
32 density (OD) at 660 nm reached 0.3, nisin A (2 µg/ml) or nukacin ISK-1 (4 µg/ml) was  
33 added to the medium. When the OD<sub>660</sub> reached 0.5, the bacterial cells were pelleted by  
34 centrifugation at 5,000 x g and 4°C for 5 min and stored at -80°C until needed. Total

35 RNA was extracted from the bacterial cells using a FastRNA Pro Blue Kit (MP  
36 Biomedicals, Cleveland, OH, USA) according to the manufacturer's protocol. For  
37 microarray analysis, cDNA was synthesised from 10 µg of total RNA using a FairPlay  
38 III Microarray Labeling Kit (Agilent Technologies, Santa Clara, CA, USA), according  
39 to the manufacturer's instructions. The Agilent eArray platform was used to design a  
40 microarray; 14,028 probes (60-mers) were designed for the 2,012 protein-coding genes  
41 of *S. mutans* UA159 (up to seven probes per gene). For microarray analyses, test and  
42 control cDNAs were labeled with Alexa Fluor® 555 and Alexa Fluor® 647 (Molecular  
43 Probes Inc., OR, USA), respectively. The fluorescently labeled cDNA was purified  
44 using the QIAquick PCR Purification Kit (QIAGEN Inc., CA, USA). The Alexa Fluor®  
45 555-labeled and Alexa Fluor® 647-labeled DNAs were mixed and hybridised on an  
46 array using a Hi-RPM Gene Expression Hybridization Kit (Agilent Technologies). The  
47 arrays were then scanned with an Agilent scanner (Agilent Technologies), and data  
48 extraction, filtering and normalisation were conducted using Feature Extraction  
49 Software (Agilent Technologies), according to the manufacturer's instructions. The  
50 experiments were performed as two biological replicates, and the expression data were  
51 deposited in the Gene Expression Omnibus (<http://www.ncbi.nlm.nih.gov/geo/>) under

52 accession No. GSE44602. We considered greater than 3-fold changes with *P*-values of  
53 < 0.05 to be significant.

54

55 **Co-culture of *S. mutans* with *S. warneri* or *L. lactis*.** Aliquots of overnight *S. mutans*,  
56 *S. warneri* ISK-1, *S. warneri* ISK-1<sup>-</sup>, *L. lactis* ATCC 11454 and *L. lactis* NZ9000  
57 cultures were inoculated into TSB and grown to an OD<sub>660</sub> of 0.5. For co-culture assays,  
58 appropriate numbers of *S. mutans* (UA159 and the mutants:  $5 \times 10^6$  cells) and *L. lactis*  
59 (ATCC11454 or NZ9000:  $5 \times 10^6$ ) or *S. mutans* (UA159 and the mutants:  $2.5 \times 10^5$   
60 cells) and *S. warneri* (ISK-1 or ISK-1 $\Delta$ pPI-1:  $5 \times 10^6$ ) cells were added to 5 ml of TSB  
61 and grown at 37°C with 5% CO<sub>2</sub> for 8 h. The optimal ratios for the co-culture assays  
62 were determined through preliminary experiments investigating the effects of various  
63 ratios of *L. lactis* or *S. warneri* on *S. mutans* growth. The appropriate dilutions were  
64 plated on TSA with or without 64  $\mu$ g/ml of bacitracin for the selection of *S. mutans*.  
65 After 2 days, the numbers of CFUs on TSA plates with and without bacitracin were  
66 determined, and the percentage of the population represented by the *S. mutans* strain  
67 was calculated.

68

69

70 **Supplemental Tables**

71

72 Table S1. Strains used in this study

73

| Strain names | Inactivated Gene ID <sup>1</sup> | Gene name                 | Features                                                            | References |
|--------------|----------------------------------|---------------------------|---------------------------------------------------------------------|------------|
| UA159        | -                                | -                         | laboratry strain                                                    | (4)        |
| TCS45        | SMU.45-6                         | unassigned                | hk <sup>2</sup> -rr <sup>3</sup> deletion mutant, Em <sup>f</sup>   | This study |
| TCS1         | SMU.486-7                        | <i>liaSR</i>              | hk-rr deletion mutant, Em <sup>f</sup>                              | This study |
| TCS2         | SMU.577-6                        | unassigned                | hk-rr deletion mutant, Em <sup>f</sup>                              | This study |
| TCS3         | SMU.659-60                       | <i>nsrRS</i> <sup>5</sup> | hk-rr deletion mutant, Em <sup>f</sup>                              | This study |
| TCS4         | SMU.928-7                        | <i>relSR</i>              | hk-rr deletion mutant, Em <sup>f</sup>                              | This study |
| TCS5         | SMU.1009-8                       | unassigned                | hk-rr deletion mutant, Em <sup>f</sup>                              | This study |
| TCS6         | SMU.1037-8                       | unassigned                | hk-rr deletion mutant, Em <sup>f</sup>                              | This study |
| TCS7         | SMU.1128-9                       | <i>ciaRH</i>              | hk-rr deletion mutant, Em <sup>f</sup>                              | (5)        |
| TCS8         | SMU.1146-5                       | <i>lcrRS</i> <sup>5</sup> | hk-rr deletion mutant, Em <sup>f</sup>                              | This study |
| TCS9         | SMU.1516-7                       | <i>vicK</i>               | hk deletion mutant, Em <sup>f</sup>                                 | This study |
| TCS10        | SMU.1548-9                       | unassigned                | hk-rr deletion mutant, Em <sup>f</sup>                              | This study |
| TCS11        | SMU.1815-4                       | unassigned                | hk-rr deletion mutant, Em <sup>f</sup>                              | This study |
| TCS12        | SMU.1916-7                       | <i>comDE</i>              | hk-rr deletion mutant, Em <sup>f</sup>                              | This study |
| TCS13        | SMU.1965-4                       | <i>levRS</i>              | hk-rr deletion mutant, Em <sup>f</sup>                              | This study |
| TCS14        | SMU.1924                         | <i>gcrR</i>               | rr deletion mutant, Em <sup>f</sup>                                 | This study |
| MM3105       | SMU.659                          | <i>nsrS</i>               | hk deletion mutant, Em <sup>f</sup>                                 | This study |
| MM3098       | SMU.1145                         | <i>lcrS</i>               | hk deletion mutant, Em <sup>f</sup>                                 | This study |
| MM3015       | SMU.654                          | unassigned                | ABC transporter deletion mutant, Em <sup>f</sup>                    | This study |
| MM3014       | SMU.654-7                        | unassigned                | ABC transporter deletion mutant, Em <sup>f</sup>                    | This study |
| MM3008       | SMU.654+656                      | unassigned                | ABC transporter deletion mutant, Em <sup>f</sup> , Spc <sup>f</sup> | This study |
| MM3019       | SMU.658                          | <i>nsrX</i> <sup>5</sup>  | SMU.658 deletion mutant, Em <sup>f</sup>                            | This study |
| MM3081       | SMU.658-660                      | <i>nsrXRS</i>             | 658- <i>nsrRS</i> deletion mutant, Em <sup>f</sup>                  | This study |
| MM3021       | SMU.1148-50                      | <i>lctFEG</i>             | ABC transporter deletion mutant, Em <sup>f</sup>                    | This study |

| Strain names                        | complement | Gene name   | Features                                                                     | References |
|-------------------------------------|------------|-------------|------------------------------------------------------------------------------|------------|
|                                     | Gene ID    |             |                                                                              |            |
| MM3106                              | SMU.659    | <i>nsrS</i> | <i>nsrS</i> complement strain in MM3105, Em <sup>r</sup> , Spc <sup>r6</sup> | This study |
| MM3104                              | SMU.1145   | <i>lcrS</i> | <i>lcrS</i> complement strain in MM3098, Em <sup>r</sup> , Spc <sup>r</sup>  | This study |
| MM3055                              | SMU.658    | <i>nsrX</i> | <i>nsrX</i> complement strain in MM3019, Em <sup>r</sup> , Spc <sup>r</sup>  | This study |
| MM3074                              | SMU.658    | <i>nsrX</i> | <i>nsrX</i> mplement strain in TCS3, Em <sup>r</sup> , Spc <sup>r</sup>      | This study |
| MM3083                              | SMU.658    | <i>nsrX</i> | <i>nsrX</i> complement strain in MM3081, Em <sup>r</sup> , Spc <sup>r</sup>  | This study |
| Bacteriocin-producing strains       |            | class       | bacteriocins                                                                 | References |
| <i>Lactococcus lactis</i> ATCC11454 |            | I           | nisin A                                                                      | (6)        |
| <i>Lactococcus lactis</i> NZ9000    |            | -           | nisin A non-producing                                                        | (7)        |
| <i>Staphylococcus warneri</i> ISK-1 |            | I           | nukacin ISK-1                                                                | (8)        |
| <i>S. warneri</i> ISK-1ΔpPI-1       |            | -           | pPI-1 cured strain, nukacin ISK-1                                            | (9)        |
| <i>Lactococcus lactis</i> CNRZ481   |            | I           | lactacin 481                                                                 | (10)       |
| <i>Enterococcus mundtii</i> QU 2    |            | IIa         | munditacin                                                                   | (11)       |
| <i>Streptococcus mutans</i> UA159   |            | IIb         | mutacin IV                                                                   | (12)       |
| <i>Lactococcus</i> sp. QU 12        |            | IIc         | lactocyclicin Q                                                              | (13)       |
| <i>Lactococcus lactis</i> QU 5      |            | IIId        | lactacin Q                                                                   | (14)       |

74 <sup>1</sup> Gene IDs are from the GEO of the NCBI Database (<http://www.ncbi.nlm.nih.gov/geo/>)

75 <sup>2</sup> histidine kinase

76 <sup>3</sup> response regulator

77 <sup>4</sup> erythromycin resistance

78 <sup>5</sup> designated in this study

79 <sup>6</sup> spectinomycin resistance

80

81 Table S2. Primers used in this study.

82

| name of primers | purpose               | forward                          | reverse                          |
|-----------------|-----------------------|----------------------------------|----------------------------------|
| tcs45-46-up     | SMU.45-6 deletion     | aataccaagagtctgagc               | cagtcgaggatcccatctaagactaacata   |
| tcs45-46-dw     | SMU.45-6 deletion     | gctgacctagt aattattgatgaatcaggag | gagatgttgcacatagt                |
| tcs1-up         | <i>liaSR</i> deletion | atcctatacaattgctgc               | cagtcgaggatccgcgtataaaaaaatcatt  |
| tcs1-dw         | <i>liaSR</i> deletion | gctgacctagttttagtgccacaggagc     | cctcatgatTTTTATAAAAAT            |
| tcs2-up         | SMU.577-6 deletion    | ttaaataattggttaaagagg            | cagtcgaggatccaagtctctgaaataataa  |
| tcs2-dw         | SMU.577-6 deletion    | gctgacctagtagaattgaatgctcatttg   | ccttcagctttgagaatat              |
| tcs3-up         | <i>nsrRS</i> deletion | tttccgattattctccc                | cagtcgaggat ttacaaaaatacgggtcat  |
| tcs3-dw         | <i>nsrRS</i> deletion | gctgacctagttaccactggctaaaatgt    | ctccacaggttcaccaa                |
| tcs4-up         | <i>relSR</i> deletion | ttgcacgtataaagaccaa              | cagtcgaggatctgctcttctctctgct     |
| tcs4-dw         | <i>relSR</i> deletion | gctgacctagtgatgccattacttttaagg   | ccctcaaacttctaataa               |
| tcs5-up         | SMU.1009-8 deletion   | tttactcaactgctgcg                | cagtcgaggatcaaccaagtaaatTTTTCT   |
| tcs5-dw         | SMU.1009-8 deletion   | gctgacctagtattgatcaaggaacacag    | cgcatgtactagctatt                |
| tcs6-up         | SMU.1038-7 deletion   | atttagaacaatgccggc               | cagtcgaggattctcaatttgtaaaatagct  |
| tcs6-dw         | SMU.1038-7 deletion   | gctgacctagttttatttaactgtaacgcta  | gcgaaccggttatttctt               |
| tcs7-up         | <i>ciaRH</i> deletion | gtgagaattggcgctgga               | cagtcgaggatctattatagcatgacttgg   |
| tcs7-dw         | <i>ciaRH</i> deletion | gctgacctagtctcgcctgcttctaata     | aaaatggccagtctgc                 |
| tcs8-up         | <i>lcrRS</i> deletion | aatttaagcaaacgttga               | cagtcgaggatcatgctgttacctcgata    |
| tcs8-dw         | <i>lcrRS</i> deletion | gctgacctagtttgaaagtacgattgct     | attgactttgacggctga               |
| tcs9-up         | <i>vicK</i> deletion  | cagccatgtccaattattatg            | cagtcgaggataaaggacttgattcaaaca   |
| tcs9-dw         | <i>vicK</i> deletion  | gctgacctagt caatagtgaggaaggcga   | aactagatgagtaaaaggc              |
| tcs10-up        | SMU.1548-9 deletion   | ttctattattgtgacttttat            | cagtcgaggat tccacataggataatagttt |
| tcs10-dw        | SMU.1548-9 deletion   | gctgacctagtacctgttttcgagaactg    | caaggcgacatataaggc               |
| tcs11-up        | SMU.1815-4 deletion   | gtcgtccgatcaagatagtg             | cagtcgaggatggatgctttttcaataatt   |
| tcs11-dw        | SMU.1815-4 deletion   | gctgacctagtactctggttcagacaat     | acacgagagaaatcaatga              |
| tcs12-up        | <i>comDE</i> deletion | ggtgtcgtcattctcct                | cagtcgaggataggttagctgattaacac    |
| tcs12-dw        | <i>comDE</i> deletion | gctgacctagttagaggaggcctattctc    | ctatcagctgcgctgfta               |
| tcs13-up        | <i>levRS</i> deletion | tctcaatgctgaagtgga               | cagtcgaggatctgccaccctgttaaatc    |
| tcs13-dw        | <i>levRS</i> deletion | gctgacctagtacctattggtcttgttg     | agcaacctaccctcatc                |
| tcs14-up        | <i>gcrR</i> deletion  | cacggacaagtcaagaga               | cagtcgaggatgaaactccttacgttac     |
| tcs14-dw        | <i>gcrR</i> deletion  | gctgacctagttaggtctgtgaagtgt      | agcagcatcactgccaat               |

|           |                               |                                     |                                 |
|-----------|-------------------------------|-------------------------------------|---------------------------------|
| mm3105-up | <i>nsrS</i> deletion          | ttttgtcgggacattcg                   | cagtcgaggat ctaactgtcgcaaaatact |
| mm3105-dw | <i>nsrS</i> deletion          | gctgacctagttggctaaactattgcagaca     | ttgggtctgattaataccat            |
| mm3098-up | <i>lcrS</i> deletion          | aacttctactataaccagta                | cagtcgaggatccaagccataaacaataat  |
| mm3098-dw | <i>lcrS</i> deletion          | gctgacctagttttaaagtacgattgtc        | attgactttgacggctga              |
| mm3015-up | SMU.654 deletion              | taaacggccaatccaag                   | cagtcgaggatcgctgtcctcctataga    |
| mm3015-dw | SMU.654 deletion              | gctgacctagtttcgttccttcctacac        | ccaattatagggatccgt              |
| mm3014-up | SMU.654-7deletion             | taaacggccaatccaag                   | cagtcgaggatcgctgtcctcctataga    |
| mm3014-dw | SMU.654-7deletion             | gctgacctagtgatagaatttagaactgc       | acttgagtaaacataggg              |
| mm3019-up | <i>nsrX</i> deletion          | cgcagtcctactaacttt                  | cagtcgaggaagctgaaatcccgttagt    |
| mm3019-dw | <i>nsrX</i> deletion          | gctgacctagtgcttatacctgtcagta        | tcatactcagacttggtc              |
| mm3008-up | SMU.656 deletion              | ttcaggagtgcgtaat                    | cagtcgaggatgccaaagtcagcacttta   |
| mm3008-dw | SMU.656 deletion              | gctgacctagttgggtccattatgctcag       | taatcccgcataaccgt               |
| mm3081-up | <i>nsrXRS</i> deletion        | cgcagtcctactaacttt                  | cagtcgaggaagctgaaatcccgttagt    |
| mm3081-dw | <i>nsrXRS</i> deletion        | gctgacctagttggctaaactattgcagaca     | ttgggtctgattaataccat            |
| mm3021-up | <i>lctFEG</i> deletion        | gtttgacgatgtagctgt                  | cagtcgaggattagccgtgcttttgcca    |
| mm3021-dw | <i>lctFEG</i> deletion        | gctgacctagtttagcagtcagtcagctt       | aagcagcagcagatcgta              |
| mm3050-up | <i>levDFEG</i> deletion       | tcaaaagctttgactgtt                  | cagtcgaggatgaatacacctactttctttt |
| mm3050-dw | <i>levDFEG</i> deletion       | gctgacctagttcgttgatgattttgaag       | ttaatcgtttacaactgct             |
| Emr       | erythromycin resistance gene  | atcctcgactggaagcaacttaagagtgtgtgaca | actaggtcagcttatttctcccgttaaa    |
| Spcr      | spectinomycin resistance gene | atcctcgactgatcgattttcgttcgtga       | actaggtcagcttccaccatttttcaattt  |
| ftf-comp  | complementation               | aagaacaagaaagctcatcatgtttcaac       | cggcccggttcgttctgttctctca       |
| mm3106    | <i>nsrS</i> complementation   | taaggatccaactattgggcttgagcc         | tctttgttcttaacgaaatcattttatttc  |
| mm3104    | <i>lcrS</i> complementation   | ggatcctgacagttaagggttg              | tctttgttcttacttgattataaacacttct |
| mm3055    | <i>nsrX</i> complementation   | tgggatccttatgatgtgagggtc            | tctttgttcttattacaaaatacgggtc    |



84 **REFERENCES**

- 85 1. **Kawada-Matsuo M, Shibata Y, Yamashita Y.** 2009. Role of two component  
86 signaling response regulators in acid tolerance of *Streptococcus mutans*. Oral  
87 Microbiol. Immunol. **24**:173-176.
- 88 2. **Shiroza T, Kuramitsu HK.** 1993. Construction of a model secretion system for  
89 oral streptococci. Infect. Immun. **61**:3745-3755.
- 90 3. **LeBlanc DJ, Lee LN, Inamine JM.** 1991. Cloning and nucleotide base  
91 sequence analysis of a spectinomycin adenylyltransferase AAD(9) determinant  
92 from *Enterococcus faecalis*. Antimicrob. Agents Chemother. **35**:1804-1810.  
93
- 94 4. **Murchison HH, Barrett JF, Cardineau GA, Curtiss R, 3rd.** 1986.  
95 Transformation of *Streptococcus mutans* with chromosomal and shuttle plasmid  
96 (pYA629) DNAs. Infect. Immun. **54**:273-282.
- 97 5. **Mazda Y, Kawada-Matsuo M, Kanbara K, Oogai Y, Shibata Y, Yamashita Y,**  
98 **Miyawaki S, Komatsuzawa H.** 2012. Association of CiaRH with resistance of  
99 *Streptococcus mutans* to antimicrobial peptides in biofilms. Mol. Oral Microbiol.  
100 **27**:124-135.
- 101 6. **Chandrapati S, O'Sullivan DJ.** 2002. Characterization of the promoter regions

- involved in galactose- and nisin-mediated induction of the nisA gene in  
*Lactococcus lactis* ATCC 11454. Mol. Microbiol. **46**:467-477.
7. **Islam MR, Nishie M, Nagao J, Zendo T, Keller S, Nakayama J, Kohda D, Sahl HG, Sonomoto K.** 2012. Ring A of nukacin ISK-1: a lipid II-binding motif for type-A(II) lantibiotic. J. Am. Chem. Soc. **134**:3687-3690.
8. **Sashihara T, Kimura H, Higuchi T, Adachi A, Matsusaki H, Sonomoto K, Ishizaki A.** 2000. A novel lantibiotic, nukacin ISK-1, of *Staphylococcus warneri* ISK-1: cloning of the structural gene and identification of the structure. Biosci. Biotechnol. Biochem. **64**:2420-2428.
9. **Aso Y, Koga H, Sashihara T, Nagao J, Kanemasa Y, Nakayama J, Sonomoto K.** 2005. Description of complete DNA sequence of two plasmids from the nukacin ISK-1 producer, *Staphylococcus warneri* ISK-1. Plasmid **53**:164-178.
10. **Rince A, Dufour A, Uguen P, Le Pennec JP, Haras D.** 1997. Characterization of the lactacin 481 operon: the *Lactococcus lactis* genes *lctF*, *lctE*, and *lctG* encode a putative ABC transporter involved in bacteriocin immunity. Appl. Environ. Microbiol. **63**:4252-4260.
11. **Zendo T, Eungruttanagorn N, Fujioka S, Tashiro Y, Nomura K, Sera Y,**

- 119           **Kobayashi G, Nakayama J, Ishizaki A, Sonomoto K.** 2005. Identification and  
120           production of a bacteriocin from *Enterococcus mundtii* QU 2 isolated from  
121           soybean. J. Appl. Microbiol. **99**:1181-1190.
- 122    12.   **Hossain MS, Biswas I.** 2011. Mutacins from *Streptococcus mutans* UA159 are  
123           active against multiple streptococcal species. Appl. Environ. Microbiol.  
124           **77**:2428-2434.
- 125    13.   **Sawa N, Zendo T, Kiyofuji J, Fujita K, Himeno K, Nakayama J, Sonomoto**  
126           **K.** 2009. Identification and characterization of lactocyclicin Q, a novel cyclic  
127           bacteriocin produced by *Lactococcus* sp. strain QU 12. Appl. Environ. Microbiol.  
128           **75**:1552-1558.
- 129    14.   **Fujita K, Ichimasa S, Zendo T, Koga S, Yoneyama F, Nakayama J,**  
130           **Sonomoto K.** 2007. Structural analysis and characterization of lacticin Q, a  
131           novel bacteriocin belonging to a new family of unmodified bacteriocins of  
132           gram-positive bacteria. Appl. Environ. Microbiol. **73**:2871-2877.  
133
